# Supplementary material for: Separating Signal from Noise in Wastewater Data: An Algorithm to Identify Community-Level COVID-19 Surges
Source: bioRxiv or medRxiv preprint supplement (doi:10.1101/2022.09.19.22280095), 2022-10-27
Supplement: Supplementary file [file media-1.pdf]

# Separating Signal from Noise in Wastewater Data: An Algorithm to Identify Community-Level COVID-19 Surges

Aparna Keshaviah<sup>1\*</sup>, Ian Huff<sup>1</sup>, Xindi C. Hu<sup>1</sup>, Virginia Guidry<sup>2</sup>, Ariel Christensen<sup>2</sup>, Steven Berkowitz<sup>2</sup>, Stacie Reckling<sup>2</sup>, Sandra McLellan<sup>3</sup>, Adélaïde Roguet<sup>3</sup>, Isabel Mussa<sup>1</sup>

<sup>1</sup> Mathematica, Inc., Princeton, New Jersey, 08543, USA

<sup>2</sup> North Carolina Department of Health and Human Services, Division of Public Health, Raleigh, North Carolina, 27609, USA

<sup>3</sup> School of Freshwater Sciences, University of Wisconsin-Milwaukee, Milwaukee, Wisconsin, 53204, USA

\* Corresponding author

Aparna Keshaviah

Email: AKeshaviah@mathematica-mpr.com

## Supplemental Information

**Figure S1. North Carolina Wastewater Monitoring Network sites analyzed**

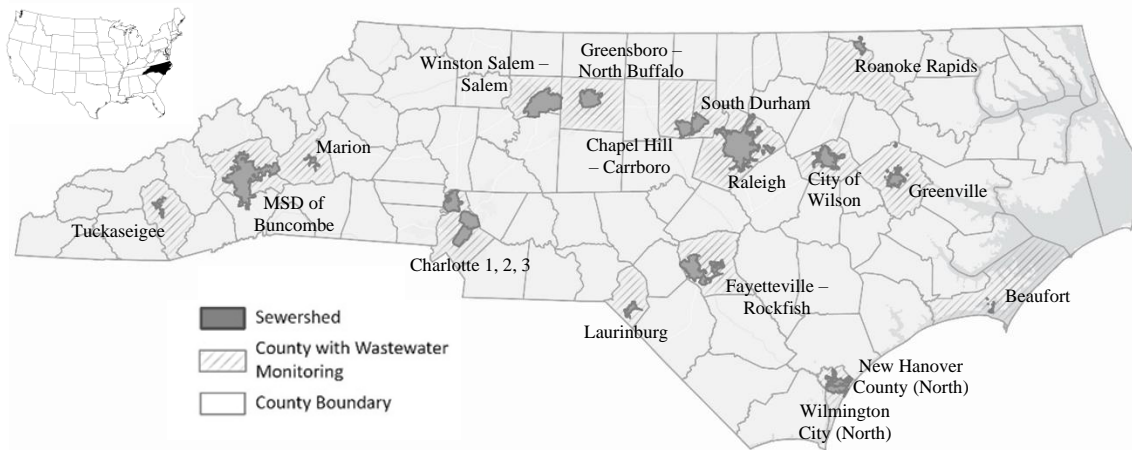

Figure S1. The map shows the sites participating in the North Carolina Wastewater Monitoring Network at the time of the analysis, including the county in which the sites reside and the geospatial boundary of the wastewater treatment plant's service population. Analyses were limited to wastewater treatment plants with sustained monitoring around the Delta and Omicron surges.
