# Supplementary material for: Separating Signal from Noise in Wastewater Data: An Algorithm to Identify Community-Level COVID-19 Surges
Source: bioRxiv or medRxiv preprint supplement (doi:10.1101/2022.09.19.22280095), 2022-10-27
Supplement: Supplementary file [file media-2.pdf]

## Separating Signal from Noise in Wastewater Data: An Algorithm to Identify Community-Level COVID-19 Surges

Aparna Keshaviah<sup>1\*</sup>, Ian Huff<sup>1</sup>, Xindi C. Hu<sup>1</sup>, Virginia Guidry<sup>2</sup>, Ariel Christensen<sup>2</sup>, Steven Berkowitz<sup>2</sup>, Stacie Reckling<sup>2</sup>, Sandra McLellan<sup>3</sup>, Adélaïde Roguet<sup>3</sup>, Isabel Mussa<sup>1</sup>

<sup>1</sup> Mathematica, Inc., Princeton, New Jersey, 08543, USA

<sup>2</sup> North Carolina Department of Health and Human Services, Division of Public Health, Raleigh, North Carolina, 27609, USA

<sup>3</sup> School of Freshwater Sciences, University of Wisconsin-Milwaukee, Milwaukee, Wisconsin, 53204, USA

\* Corresponding author

Aparna Keshaviah

Email: AKeshaviah@mathematica-mpr.com

### Supplemental Information

**Table S1. Correlations between wastewater viral concentrations and unlagged case counts**

| Site Name                  | Spearman rank correlation    |                                  |                                                              |                                                                |                                 |
|----------------------------|------------------------------|----------------------------------|--------------------------------------------------------------|----------------------------------------------------------------|---------------------------------|
|                            | Overall (county-level cases) | Pre-Delta (1/1/2021 to 4/5/2021) | Delta surge (31 days before start of surge to peak of surge) | Omicron surge (31 days before start of surge to peak of surge) | Overall (sewershed-level cases) |
| <b>Overall (19 sites)</b>  | <b>0.77</b>                  | <b>0.64</b>                      | <b>0.79</b>                                                  | <b>0.79</b>                                                    | <b>0.76</b>                     |
| Laurinburg                 | 0.75*                        | n/a                              | 0.76*                                                        | 0.72*                                                          | 0.74*                           |
| Tuckaseegee                | 0.83*                        | 0.92*                            | 0.92*                                                        | 0.70*                                                          | 0.74*                           |
| Marion                     | 0.82*                        | n/a                              | 0.65*                                                        | 0.88*                                                          | 0.81*                           |
| Beaufort                   | 0.53*                        | 0.09                             | 0.36*                                                        | 0.88*                                                          | 0.44*                           |
| Roanoke Rapids             | 0.71*                        | n/a                              | 0.82*                                                        | 0.72*                                                          | 0.72*                           |
| City of Wilson             | 0.80*                        | n/a                              | 0.72*                                                        | 0.66*                                                          | 0.80*                           |
| Chapel Hill – Carrboro     | 0.85*                        | 0.52*                            | 0.86*                                                        | 0.78*                                                          | 0.84*                           |
| Greenville                 | 0.86*                        | 0.73*                            | 0.85*                                                        | 0.79*                                                          | 0.85*                           |
| Wilmington City (North)    | 0.81*                        | 0.63*                            | 0.88*                                                        | 0.83*                                                          | 0.77*                           |
| New Hanover County (North) | 0.56*                        | 0.61*                            | 0.75*                                                        | 0.55*                                                          | 0.53*                           |
| South Durham               | 0.78*                        | 0.70*                            | 0.73*                                                        | 0.93*                                                          | 0.76*                           |
| Fayetteville – Rockfish    | 0.71*                        | n/a                              | 0.79*                                                        | 0.77*                                                          | 0.71*                           |
| MSD of Buncombe            | 0.87*                        | n/a                              | 0.94*                                                        | 0.88*                                                          | 0.86*                           |
| Winston Salem – Salem      | 0.86*                        | n/a                              | 0.89*                                                        | 0.84*                                                          | 0.86*                           |
| Greensboro – North Buffalo | 0.77*                        | n/a                              | 0.81*                                                        | 0.80*                                                          | 0.74*                           |
| Charlotte 1                | 0.80*                        | 0.64*                            | 0.86*                                                        | 0.71                                                           | 0.80*                           |
| Charlotte 2                | 0.74*                        | 0.71*                            | 0.88*                                                        | 0.83*                                                          | 0.75*                           |
| Charlotte 3                | 0.79*                        | n/a                              | 0.78*                                                        | 0.77*                                                          | 0.80*                           |
| Raleigh                    | 0.88*                        | 0.86*                            | 0.74*                                                        | 0.92*                                                          | 0.86*                           |

Note: Correlations were calculated between the wastewater viral concentrations (the arithmetic means of the N1 and N2 concentrations, normalized by the flow rate and service population size) and the 7-day rolling average of county-level case counts (unless otherwise specified). Sites are ordered by ascending county population size.

MSD = Metropolitan Sewerage District; n/a = not available (no samples were collected in the timeframe).

\*Denotes a correlation coefficient that is statistically significant ( $p < 0.05$ ).
